# Supplementary material for: Influence of micromixer characteristics on polydispersity index of block copolymers synthesized in continuous flow microreactors
Source: Royal Society of Chemistry journal article supplement (doi:10.1039/b803885f), 2008-01-01
Supplement: b803885f.pdf [file b803885f.pdf]

Supplementary information

---

**Influence of micromixer characteristics on polydispersity index of block copolymers synthesized in continuous flow microreactors**

---

**Carine Rosenfeld, Christophe Serra\*, Cyril Brochon, and Georges Hadziioannou**

*Laboratoire d'Ingénierie des Polymères pour les Hautes Technologies (LIPHT) – CNRS UMR 7165, École Européenne de Chimie, Polymères et Matériaux (ECPM), Université Louis Pasteur (ULP), 25 rue Becquerel, F-67087 Strasbourg, France.*

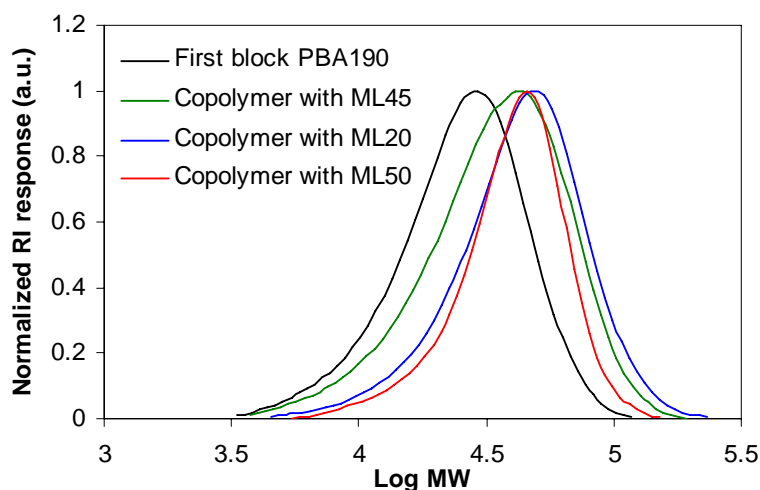

**Figure S1.** SEC traces of the first block solution PBA190 and corresponding PBA-*b*-PS block copolymers obtained in continuous flow with the different micromixers (data shown in Table 2 – Entry 1 and Table 3 – Entries 1 to 3).

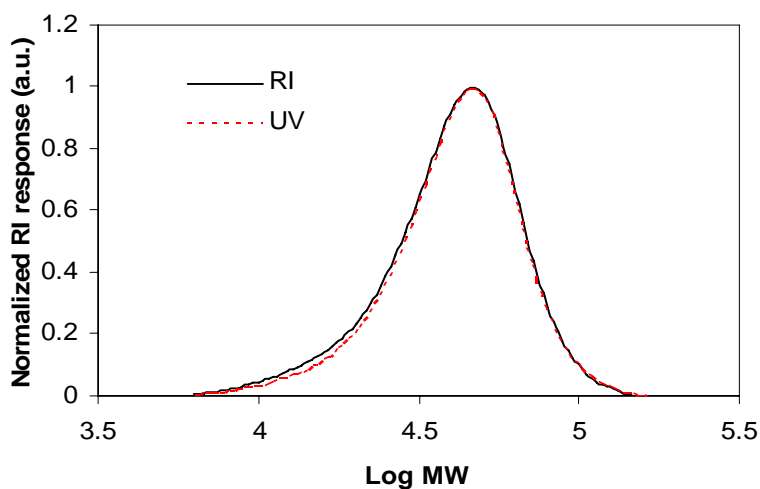

**Figure S2.** Comparison of molecular weight distributions from RI and UV detection by SEC of the PBA-*b*-PS block copolymer obtained in continuous flow microreactors with the ML50 micromixer (Entry 3 in Table 3)

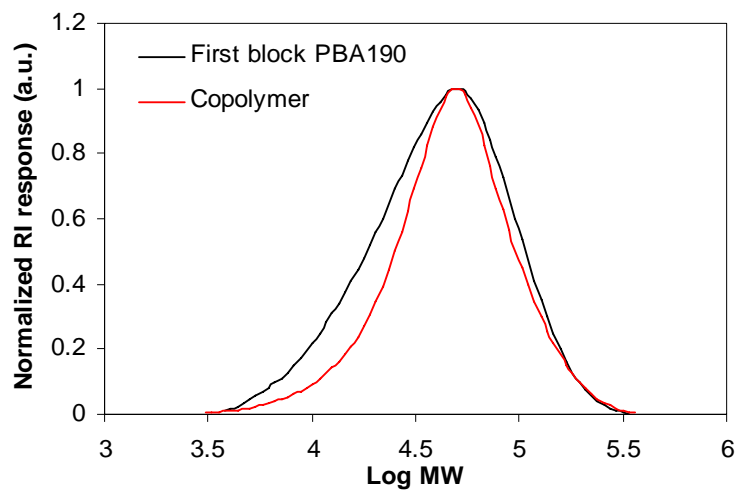

**Figure S3.** SEC traces of the first block solution PBA190 and corresponding PBA-*b*-PS block copolymers obtained in a batch reactor (reference 7).
